# Supplementary material for: A guanidine-degrading enzyme controls genomic stability of ethylene-producing cyanobacteria
Source: PubMed Central journal article supplement (PMC8390497; doi:10.1038/s41467-021-25369-x), 2021-08-26
Supplement: 41467_2021_25369_MOESM1_ESM.pdf [file 41467_2021_25369_MOESM1_ESM.pdf]

**A guanidine-degrading enzyme controls genomic stability of ethylene-producing cyanobacteria**

Wang *et al.*

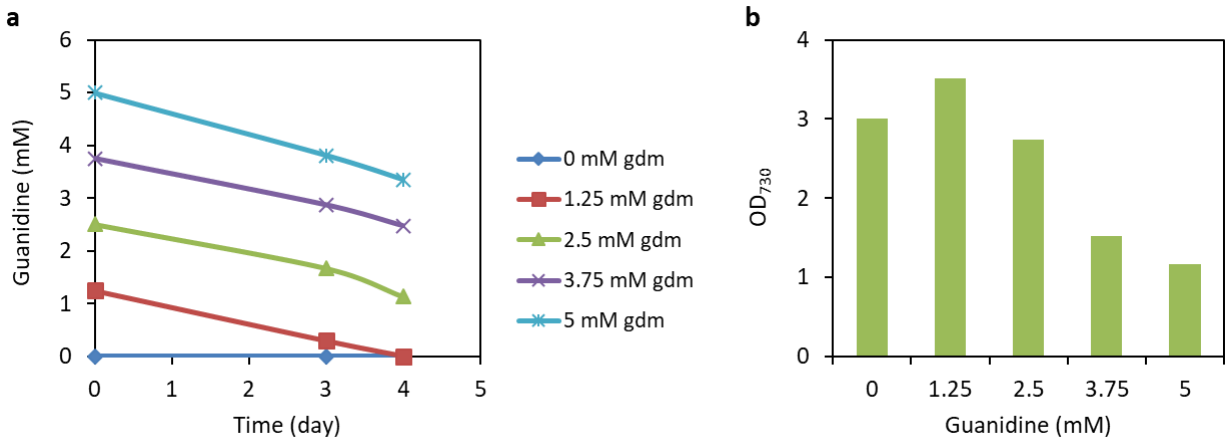

**Supplementary Fig. 1. Degradation of guanidine by *Synechocystis* culture with nitrate gradually replaced by guanidine in the medium.** *Synechocystis* 6803 was inoculated with an initial OD<sub>730</sub> of 0.1 in the mBG11 medium with nitrate adjusted from 17.6 mM to 5 mM (0 mM gdm), and then the nitrate was gradually replaced by the equal molar concentrations of guanidine until the entire 5 mM nitrate was replaced by 5 mM guanidine (5 mM gdm). **a**, Guanidine concentrations in the culture media. **b**, OD<sub>730</sub> of cell cultures three days after inoculation. Source data are provided in the Source Data file.

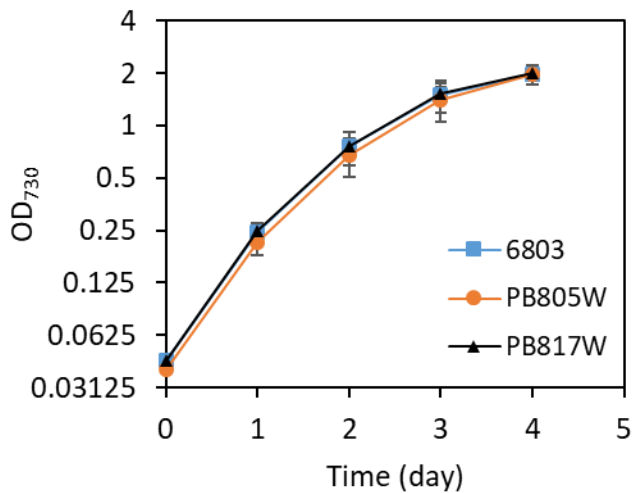

**Supplementary Fig. 2. Comparison of cell growth of *Synechocystis* strains PCC 6803, PB805W (*Δsll1077*) and PB817W (*sll1077* overexpressed).** Cells were grown in BG11 medium supplemented with 10 mM TES-NaOH (pH 8.2) and 50 mM NaHCO<sub>3</sub> under constant light of 50 μE m<sup>-2</sup> s<sup>-1</sup> on a rotary shaker at 150 rpm and 30 °C. Data represent the means and standard deviations of three independent biological replicates. Source data are provided in the Source Data file.

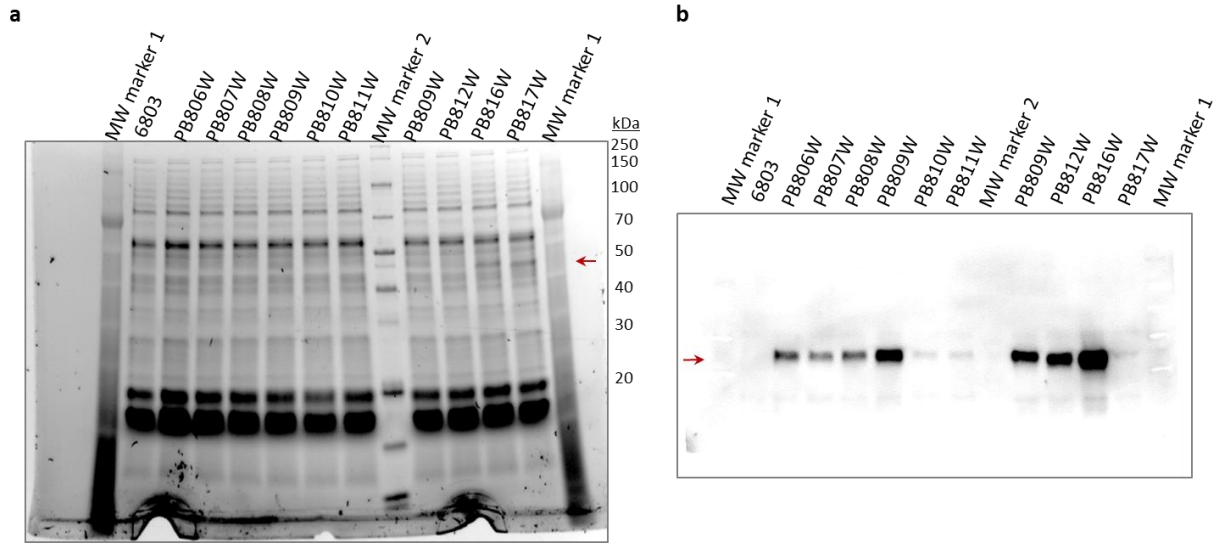

**Supplementary Fig. 3. SDS-PAGE and western blot for comparison of expression levels of sll1077 in recombinant *Synechocystis* strains.** These are an uncropped images for generating Fig. 3b in the main text.

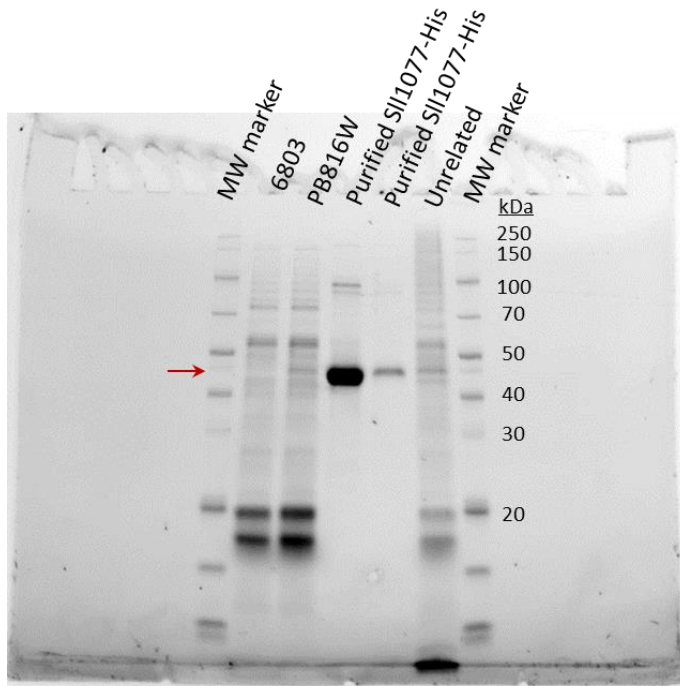

**Supplementary Fig. 4. Uncropped SDS-PAGE image showing the expression of Sll1077-His protein and the purified Sll1077-His protein.** This is an uncropped image that was used for generating Fig. 4a in the main text.

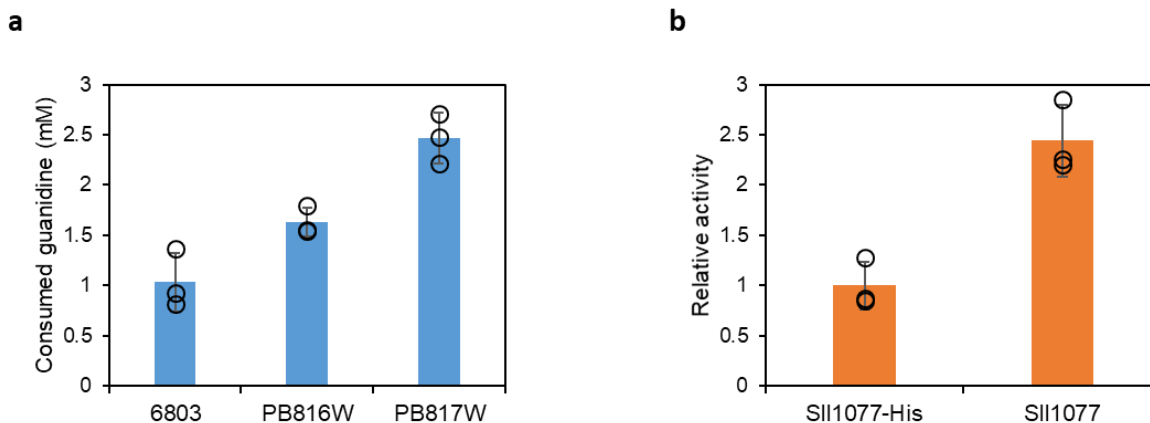

**Supplementary Fig. 5. Effect of removal of His-tag on the enzyme activity of SII1077.** Cell lysate containing the same amount of total soluble protein from each strain was incubated with 10 mM guanidine, 1 mM MnCl<sub>2</sub>, and 20 mM Tris·HCl (pH7.5) at 30 °C for three hours. Then, the amounts of guanidine that had been consumed in the solution were calculated. ‘6803’ is the wild-type *Synechocystis* 6803 strain that expresses the native SII1077; ‘PB816W’ expresses the native SII1077 and also expresses the His-tagged SII1077-His through the recombinant expression cassette; ‘PB817W’ expresses the native SII1077 and also expresses the tag-free SII1077 through the recombinant expression cassette. **a**, Consumed guanidine by each cell lysate. **b**, Relative enzyme activity introduced by expressing SII1077-His and the untagged SII1077; calculated based on panel a. Data represents means and standard deviations from three replicates. Source data are provided in the Source Data file.

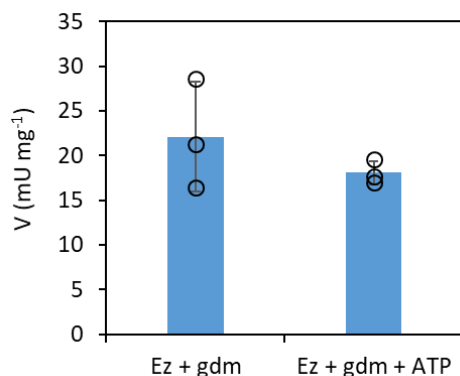

**Supplementary Fig. 6. Effect of presence of ATP on the enzyme activity of SII1077-His.** ‘Ez + gdm’ indicates purified SII1077-His incubated with 5 mM guanidine, 1 mM MnCl<sub>2</sub>, 50 mM NaCl and 20 mM Tris·HCl (pH7.5). ‘Ez + gdm + ATP’ is the same as ‘Ez + gdm’ except that ATP is added to a final concentration of 1 mM. Data represents means and standard deviations from three replicates. Source data are provided in the Source Data file.

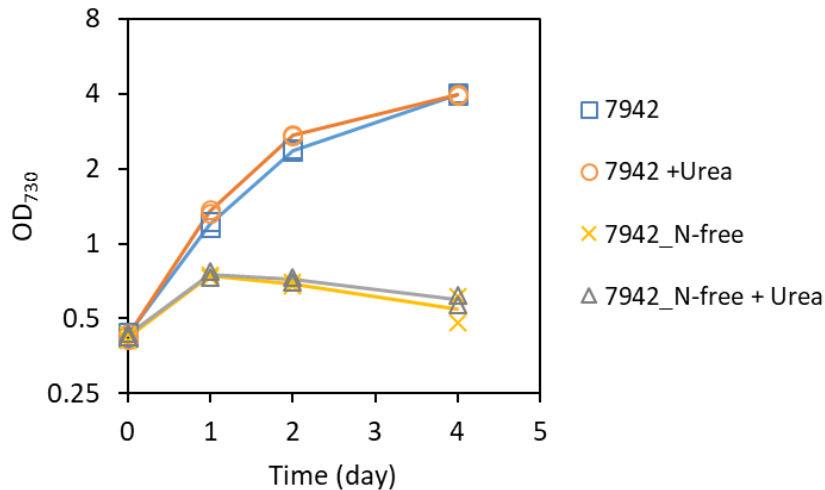

**Supplementary Fig. 7. Tolerance of *Synechococcus* 7942 to urea.** Cell growth curves of *Synechococcus* 7942 grown in nitrate-containing or nitrate-deprived BG11 medium (N-free) supplemented with 50 mM NaHCO<sub>3</sub>, with or without 5 mM urea, under constant light of 50  $\mu\text{E m}^{-2} \text{s}^{-1}$  on a rotary shaker at 150 rpm and 30 °C. Data represent the average of two independent biological replicates and are overlaid with individual data points. Source data are provided in the Source Data file.

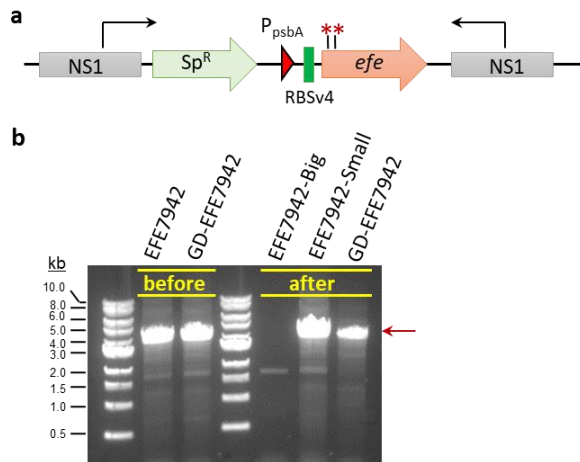

**Supplementary Fig. 8. Improved genomic stability of the *efe*-expressing *Synechococcus* 7942 derivative strain through co-overexpressing *sll1077*.** **a**, Schematic structure of the EFE expression cassette inserted into the genomes of *Synechococcus elongatus* strains EFE7942 and GD-EFE7942. Arrows indicate the primers used for PCR verification of genotypes of the *efe*-expressing strains. Red asterisks indicate sites where mutation occurred causing early termination of the translation of EFE in the randomly chosen big colonies of strain EFE7942 pictured in Fig. 6a. **b**, Colony PCR results showing the genotypes of *efe*-expressing cells initially grown on agar plates placed at 35 °C (“before”) and then on agar plates placed at 30 °C (“after” as depicted in Fig. 6a). DNA fragments were amplified using primers illustrated as black arrows in a. Red arrow indicates the expected size of the PCR product should cells maintain the correct EFE expression cassette. Data represent results from at least three independent experiments.

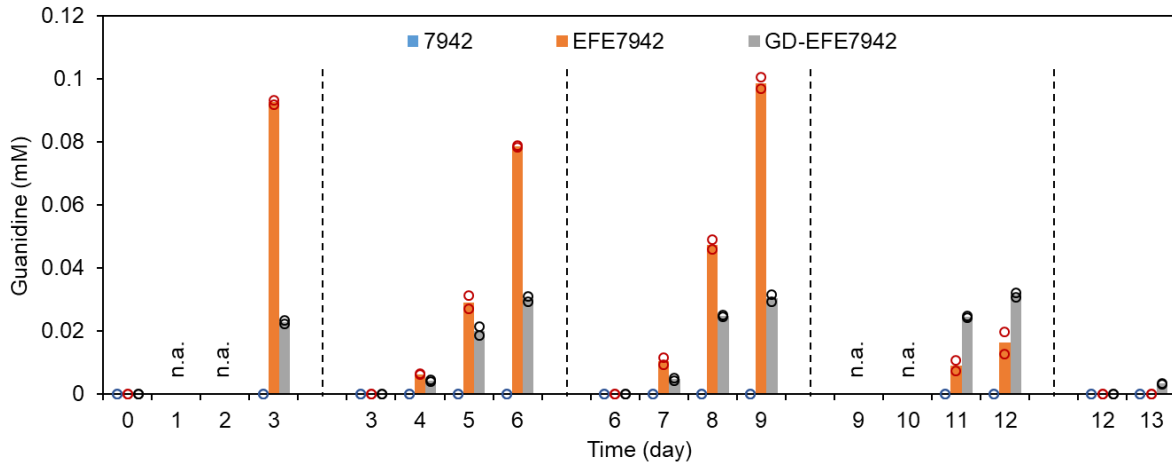

**Supplementary Fig. 9. Guanidine accumulative titers in the culture supernatants of *Synechococcus* strains.** *Synechococcus* strains 7942, EFE7942 and GD-EFE7942 were grown under the same conditions as in Fig. 6b-d. “n.a.” means samples were not saved for analysis of guanidine. Batch #1, day 0 – 3; batch #2, day 3 – 6; batch #3, day 6 – 9; batch #4, day 9 – 12; batch #5, day 12 – 13. Data represent means (as indicated by the bar chart) of two independent biological replicates and are overlaid with individual data points (shown as empty circles). Source data are provided in the Source Data file.

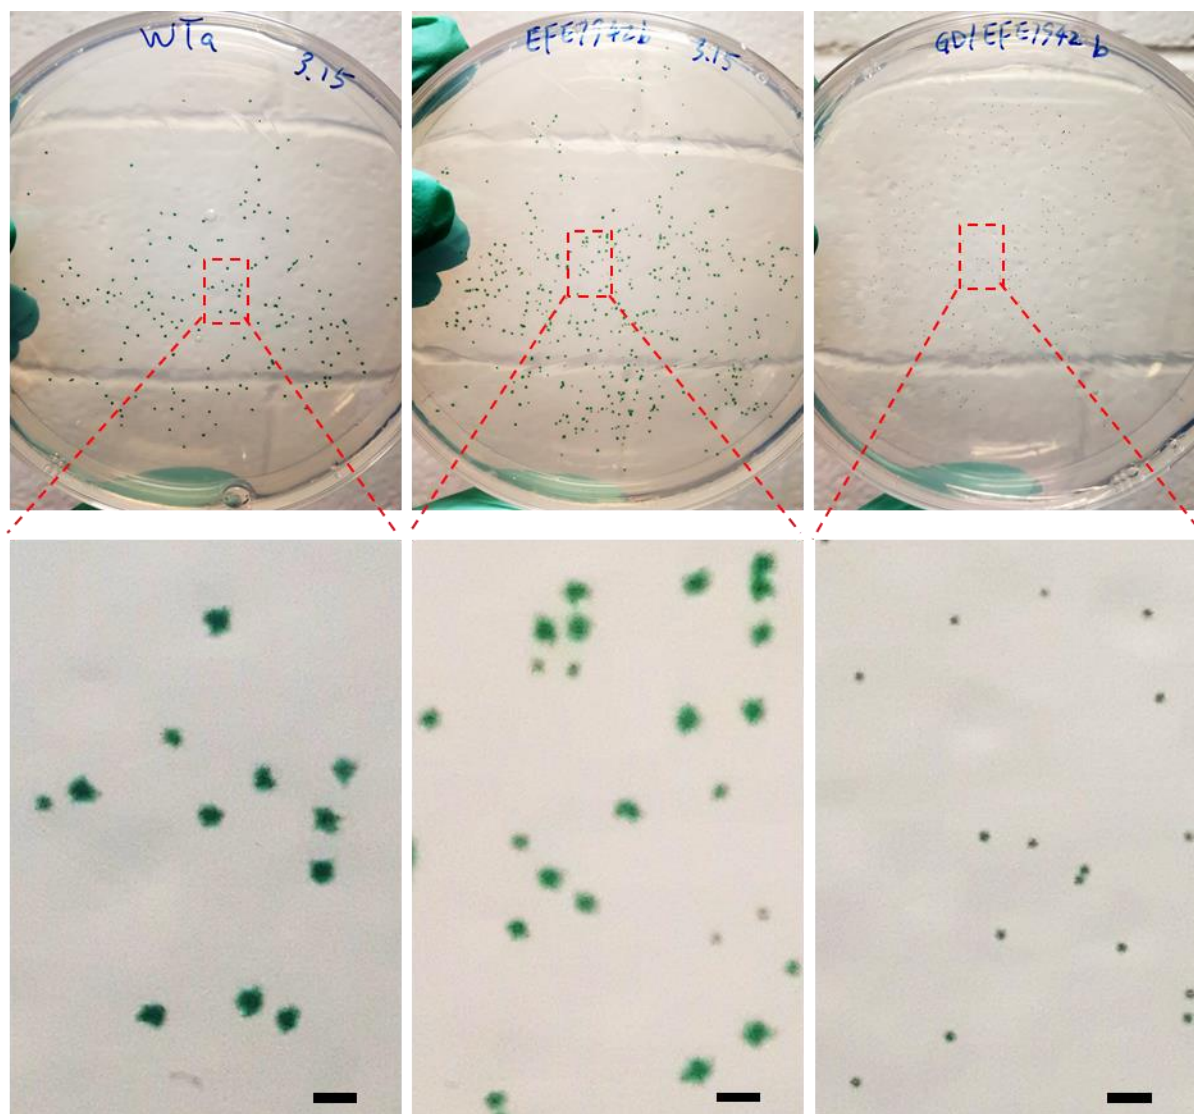

**Supplementary Fig. 10. Colonies formed on agar plates spread with diluted 13<sup>th</sup> day cultures in Fig. 6b-d.** *Synechococcus* strains 7942, EFE7942 and GD-EFE7942 were grown under the same conditions as in Fig. 6b-d were diluted and spread on to BG11 agar plates and incubated under light of  $\sim 15 \mu\text{E m}^{-2} \text{s}^{-1}$  at ambient temperature for two weeks. Scale bars indicate 1 mm.

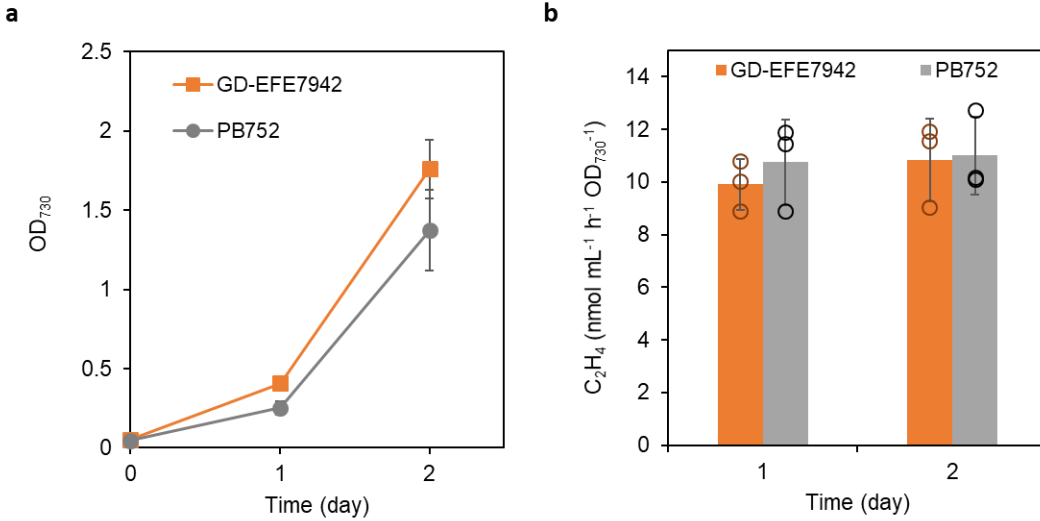

**Supplementary Fig. 11. Comparison of ethylene productivities between *efe*-expressing *Synechococcus* strain GD-EFE7942 and *Synechocystis* strain PB752. a**, Growth of two cyanobacterial strains. **b**, Specific ethylene productivities. Strains were inoculated in the mBG11 medium with an initial OD<sub>730</sub> of about 0.05, under 120  $\mu\text{E m}^{-2} \text{s}^{-1}$ , 130 rpm, 30 °C, aerated with 1% CO<sub>2</sub>. Data represents means and standard deviations from three independent biological replicates. Source data are provided in the Source Data file.

```

S111077 1  MSDATPFRPPSEAEELIKETRLPLTGWQQEVDQGLTYGLEAAASIKDRSIPTFRSGELPHYAGINTFMKAP--YLED-- 76
S110228 1  -----MHSPNKFTSGPKQFLESEA 19

S111077 77  VREVGKYDVAIVGVPHDSGTTYRPGTRFGPGQIRRISALYTPYNFEMGVDLREQISLCDVGDIFTIPANNEKSF----- 151
S110228 20  ITSYADAADVVPPIPYEATTSYRKGCEHGP EAVLEASDQLEAYDEELGTS PCH-----DLGIYTCA PLADSNKHPALAGD 94

S111077 152  ---QISKGIAHIFSSGAFPIILGGDHSIGFPTVRGICRHLGDKKVGIIHFDRHVDTQETDLDERMHTCPWFHATNMANA 227
S110228 95  AMVTEVCDGIAPFVEDGKFVVAIGGEHAITTGTVFRAMQRGTS-EPFTVVQIDAHGD-MRDKFEGSCHNHACVMRRVLELG 172

S111077 228  PAKNLVQLGIGGWQVPRQGVKVCRRERATNILTVDITMSLDAAADF AIA RATDGTDCVWISFDIDCIDAGFVPGTGWPE 307
S110228 173  ---LPTLPTAIRAICQEEADLIREKNIPVFWAREMADN--PNWINEAIASIT--TQKVFLTIDMDGFDPGFMPGVGTPE 244

S111077 308  PGGLLPREALYLLKRIIRETNVCGMEVVEVSPPYDISDMTSLMATRVICDTMAHLVVSQQLPRTEKPAYIHAEANMAVDE 387
S110228 245  PGGLGWYEGLNFFRRLFQTKQVIGCDLME LAPVRG-SVVFSEFSTAKLAYKLMGYW---GESQRKKL----- 306

S111077 388  PWQ 390
S110228 ---

```

**Supplementary Fig. 12. Comparison of protein sequences of S111077 and S110228 of the *Synechocystis* 6803 strain.** Red letters indicate identical amino acids. Bold letters indicate the conservative putative active cite of agmatinase family proteins<sup>1</sup>. Underscored letters indicate the conservative manganese [Mn] ion binding site<sup>1</sup>.



**Supplementary Table 1. All strains and plasmids used in this study.**

| Strains                                   | Genotype or features                                                                                                               | Sources      |
|-------------------------------------------|------------------------------------------------------------------------------------------------------------------------------------|--------------|
| NEB5α                                     | <i>fhuA2 Δ(argF-lacZ)U169 phoA glnV44 Φ80 Δ(lacZ)M15 gyrA96 recA1 relA1 endA1 thi-1 hsdR17</i>                                     | NEB          |
| <i>Synechocystis</i> sp. PCC 6803         | Wild-type                                                                                                                          | ATCC         |
| <i>Synechocystis</i> PB805W               | <i>Δsll1077</i> in <i>Synechocystis</i> sp. PCC 6803                                                                               | This study   |
| <i>Synechocystis</i> PB806W               | Overexpression (OE) of <i>slr1077-His</i> in <i>Synechocystis</i> sp. PCC 6803; inserted between <i>slr1495</i> and <i>sll1397</i> | This study   |
| <i>Synechocystis</i> PB807W               | OE of <i>sll1077-His</i> in <i>Synechocystis</i> sp. PCC 6803                                                                      | This study   |
| <i>Synechocystis</i> PB808W               | OE of <i>sll1077-His</i> in <i>Synechocystis</i> sp. PCC 6803                                                                      | This study   |
| <i>Synechocystis</i> PB809W               | OE of <i>sll1077-His</i> in <i>Synechocystis</i> sp. PCC 6803                                                                      | This study   |
| <i>Synechocystis</i> PB810W               | OE of <i>sll1077-His</i> in <i>Synechocystis</i> sp. PCC 6803                                                                      | This study   |
| <i>Synechocystis</i> PB811W               | OE of <i>sll1077-His</i> in <i>Synechocystis</i> sp. PCC 6803                                                                      | This study   |
| <i>Synechocystis</i> PB812W               | OE of <i>sll1077-His</i> in <i>Synechocystis</i> sp. PCC 6803                                                                      | This study   |
| <i>Synechocystis</i> PB816W               | OE of <i>sll1077-His</i> in <i>Synechocystis</i> sp. PCC 6803                                                                      | This study   |
| <i>Synechocystis</i> PB817W               | OE of <i>sll1077-His</i> in <i>Synechocystis</i> sp. PCC 6803                                                                      | This study   |
| <i>Synechocystis</i> PB752                | OE of <i>efe</i> in <i>Synechocystis</i> sp. PCC 6803; inserted at the <i>slr0168</i> neutral site                                 | <sup>2</sup> |
| <i>Synechococcus elongatus</i> PCC 7942   | Wild-type                                                                                                                          | In Lab       |
| <i>Synechococcus elongatus</i> EFE7942    | OE of <i>efe</i> in <i>Synechococcus elongatus</i> PCC 7942; inserted at neutral site 1, i.e., "Synpcc7942_2498"                   | This study   |
| <i>Synechococcus elongatus</i> GD44       | OE of <i>sll1077</i> in <i>Synechococcus elongatus</i> PCC 7942; inserted at neutral site 4, i.e., "Synpcc7942_0103"               | This study   |
| <i>Synechococcus elongatus</i> GD-EFE7942 | OE of <i>sll1077</i> and <i>efe</i> in <i>Synechococcus elongatus</i> PCC 7942                                                     | This study   |
| <b>Plasmids</b>                           |                                                                                                                                    |              |
| pBluescript II SK (+)                     | Amp <sup>R</sup> , pUC ori                                                                                                         | Stratagene   |
| pPB305                                    | <i>sll1077U-Cm<sup>R</sup>-sll1077D</i> , inserted to the pBluescript II SK (+) vector backbone                                    | This study   |
| pPB306                                    | <i>slr1495-Cm<sup>R</sup>-P<sub>tac</sub>-RBSv306-sll1077-His-sll1397</i> , inserted to the pBluescript II SK (+) vector backbone  | This study   |
| pPB307                                    | Derivative of pPB306; RBSv306 replaced by RBSv307                                                                                  | This study   |
| pPB308                                    | Derivative of pPB306; RBSv307 replaced by RBSv308                                                                                  | This study   |
| pPB309                                    | Derivative of pPB306; RBSv306 replaced by RBSv309                                                                                  | This study   |
| pPB310                                    | Derivative of pPB306; RBSv306 replaced by RBSv310                                                                                  | This study   |
| pPB311                                    | Derivative of pPB306; RBSv306 replaced by RBSv311                                                                                  | This study   |
| pPB312                                    | Derivative of pPB309; XhoI site between <i>sll1077</i> and His tag deleted                                                         | This study   |
| pPB316                                    | Derivative of pPB312; <i>rrnB</i> terminator added downstream of <i>sll1077-His</i>                                                | This study   |
| pPB317                                    | Derivative of pPB316; His tag removed from downstream of <i>sll1077</i>                                                            | This study   |
| pJU158                                    | <i>slr0168-P<sub>psbA</sub>-RBSv4-efe-T<sub>T7</sub>-Sm<sup>R</sup>-slr0168</i> , pUC ori                                          | <sup>3</sup> |
| pEFE-FLAG-NS1                             | NS1Up- Sm <sup>R</sup> -P <sub>psbA</sub> -RBSv4-efe-T <sub>i7</sub> - NS1Dn                                                       | This study   |
| pCX0104-LuxAB-FT                          | Zn <sup>++</sup> -inducible expression of P <sub>smtA</sub> :: <i>luxAB</i> ::3×FLAG targeted to NS4 (Cm <sup>R</sup> )            | <sup>4</sup> |
| pGD6803-NS4                               | NS4Dn-P <sub>tac</sub> -RBSv309- <i>sll1077-T<sub>rrnB</sub></i> -Cm <sup>R</sup> -NS4Up                                           | This study   |

**Supplementary Table 2 | Primers used in this study.**

| Plasmids | Primers              | DNA sequences                                        | Target          | Template source           |
|----------|----------------------|------------------------------------------------------|-----------------|---------------------------|
| pPB305   | Sll1077U3            | GGGCGAATTGGGTACCggagtttcggttaagtctaag (KpnI)         | Sll1077U        | S6803 gDNA                |
|          | Sll1077U4            | CACAGGTATCTGCAgagtagttactagctaacaac                  | Sll1077U        | S6803 gDNA                |
|          | Sll1077D3            | GAAGCAGTGTGGGATCCtagtaactttaactgactaattattgc         | Sll1077D        | S6803 gDNA                |
|          | Sll1077D4            | GAACAAAAGCTGGAGCTCcgagcagaacagtttacc (SacI)          | Sll1077D        | S6803 gDNA                |
|          | CatU3                | gtaactacctCTGCAGATACCTGTGACGGAAGATCAC                | cat             | pACYC184                  |
|          | CatD4                | aaagttactAGGATCCCACACTGCTTCCGGTAGTC                  | cat             | pACYC184                  |
| pPB300   | sll1077U1            | agatataCATATGagcgcgatgccaccccgtttc                   | sll1077         | S6803 gDNA                |
|          | sll1077D2            | ggtgCTCGAGTtccagggtcatccactg                         | sll1077         | S6803 gDNA                |
| pPB306   | sll1077U3            | CAATTCACACAAGgagatataCATATGagcgcgatgccaccccgtttc     | sll1077         | pPB300                    |
|          | sll1077-His-D4       | caattcgactgaatctccaGTCGACGTTAGCAGCCGGATCTTAGTG       | sll1077         | pPB300                    |
| pPB307   | TACR4                | GTGTGAAATTGTTATCCGCTCAC                              | RBS of pPB306d  | pPB306d                   |
|          | sll1077U307          | AAGGAGGAAACATatgagcgcgatgccaccccgtttc                | RBS of pPB306d  | pPB306d                   |
| pPB308   | TACR4                | GTGTGAAATTGTTATCCGCTCAC                              | RBS of pPB306d  | pPB306d                   |
|          | sll1077U308          | AAGGAGGAACAGCatgagcgcgatgccaccccgtttc                | RBS of pPB306d  | pPB306d                   |
| pPB309   | TACR4                | GTGTGAAATTGTTATCCGCTCAC                              | RBS of pPB306d  | pPB306d                   |
|          | sll1077U309          | AAGGAGAAACAGCatgagcgcgatgccaccccgtttc                | RBS of pPB306d  | pPB306d                   |
| pPB310   | TACR4                | GTGTGAAATTGTTATCCGCTCAC                              | RBS of pPB306d  | pPB306d                   |
|          | sll1077U310          | AAGAAGGAGAAACAGCatgagcgcgatgccaccccgtttc             | RBS of pPB306d  | pPB306d                   |
| pPB311   | TACR4                | GTGTGAAATTGTTATCCGCTCAC                              | RBS of pPB306d  | pPB306d                   |
|          | sll1077U311          | AAGAAGGAGAAACATAGCatgagcgcgatgccaccccgtttc           | RBS of pPB306d  | pPB306d                   |
| pPB312   | sll1077C-F-3xHis     | CACCACCACTAAGATCCGGCTG                               | sll1077- His    | pPB309                    |
|          | sll1077C-R-3xHis     | GTGGTGGTgttccagggtcatccactg                          | sll1077- His    | pPB309                    |
| pPB313   | sll1077C-F-TAA       | TAAGATCCGGCTGCTAAC                                   | sll1077         | pPB309                    |
|          | sll1077C-R           | TTAttgccagggtcatc                                    | sll1077         | pPB309                    |
| pPB316   | Primer rrnBU-sll1077 | TAAGATCCGGCTGCTAACAAAGCTTGCTGATACA<br>GATTAAATCAGAAC | <i>rrnBT1T2</i> | <i>E. coli</i> NEB5α gDNA |
|          | Primer rrnBD-SL1     | caattcgactgaatctccaGTCGACcaggaagagttttagaaaacg       | <i>rrnBT1T2</i> | <i>E. coli</i> NEB5α gDNA |
| pPB317   | Primer rrnBU-sll1077 | TAAGATCCGGCTGCTAACAAAGCTTGCTGATACA<br>GATTAAATCAGAAC | <i>rrnBT1T2</i> | <i>E. coli</i> NEB5α gDNA |
|          | Primer rrnBD-SL1     | caattcgactgaatctccaGTCGACcaggaagagttttagaaaacg       | <i>rrnBT1T2</i> | <i>E. coli</i> NEB5α gDNA |

|                                                                                                                                                           |           |                                    |  |        |
|-----------------------------------------------------------------------------------------------------------------------------------------------------------|-----------|------------------------------------|--|--------|
| pEFE-FLAG-NS1                                                                                                                                             |           | Blunt end cloning; no primers used |  | pJU158 |
| pGD7942-NS4                                                                                                                                               |           | Blunt end cloning; no primers used |  | pPB317 |
| Following primers were used to verify mutation at the <i>slr0168</i> neutral site of genome of <i>Synechocystis</i> 6803                                  |           |                                    |  |        |
|                                                                                                                                                           | US168e1   | CAAGAGTAGTTCCTCAACAC               |  |        |
|                                                                                                                                                           | US168e2   | CTGAAGGGATTACGCAATAC               |  |        |
| Following primers were used to verify the mutation at the <i>slr1495-sll1397</i> neutral site of genome of <i>Synechocystis</i> 6803                      |           |                                    |  |        |
|                                                                                                                                                           | VF1a      | GTC TCC AGG ATG CGT TAA C          |  |        |
|                                                                                                                                                           | VR1a      | CGA TGC AAG ATT GAT AGA CAG AG     |  |        |
| Following primers were used to verify the mutation at the <i>sll1077</i> site of genome of <i>Synechocystis</i> 6803                                      |           |                                    |  |        |
|                                                                                                                                                           | Sll1077e1 | ggcaattgtgattgattg                 |  |        |
|                                                                                                                                                           | Sll1077e2 | gaggtgaatcttggtgattg               |  |        |
| Following primers were used to verify the mutation at the neutral site 1, <i>i.e.</i> , "Synpcc7942_2498" site, of genome of <i>S. elongatus</i> PCC 7942 |           |                                    |  |        |
|                                                                                                                                                           | NS13      | GTGCAGCAGCAACTTCAAG                |  |        |
|                                                                                                                                                           | NS14      | GTGCGTTCCACAGACATC                 |  |        |
|                                                                                                                                                           | NS15      | GGCTGCTTGGCAAAAAC                  |  |        |
|                                                                                                                                                           | NS16      | CCTGTTGTGCTGTTTCGATTG              |  |        |
| Following primers were used to verify the mutation at neutral site 4, <i>i.e.</i> , "Synpcc7942_0103" site, of genome of <i>S. elongatus</i> PCC 7942     |           |                                    |  |        |
|                                                                                                                                                           | 5'NS4     | tctgctgacgccttattc                 |  |        |
|                                                                                                                                                           | 3'NS4     | atgtccaagatccagaatgt               |  |        |

## Supplementary References

1. Sekowska, A.; Danchin, A.; Risler, J. L., Phylogeny of related functions: the case of polyamine biosynthetic enzymes. *Microbiology (Reading)* **2000**, *146* ( Pt 8), 1815-1828.
2. Wang, B.; Eckert, C.; Maness, P. C.; Yu, J., A Genetic Toolbox for Modulating the Expression of Heterologous Genes in the Cyanobacterium *Synechocystis* sp. PCC 6803. *ACS Synth Biol* **2018**, *7* (1), 276-286.
3. Xiong, W.; Morgan, J. A.; Ungerer, J.; Wang, B.; Maness, P.-C.; Yu, J., The plasticity of cyanobacterial metabolism supports direct CO<sub>2</sub> conversion to ethylene. *Nature Plants* **2015**, *1*, 15053.
4. Cheah, Y. E.; Xu, Y.; Sacco, S. A.; Babele, P. K.; Zheng, A. O.; Johnson, C. H.; Young, J. D., Systematic identification and elimination of flux bottlenecks in the aldehyde production pathway of *Synechococcus elongatus* PCC 7942. *Metab. Eng.* **2020**, *60*, 56-65.
